# Supplementary material for: Formin-like 1β phosphorylation at S1086 is necessary for secretory polarized traffic of exosomes at the immune synapse in Jurkat T lymphocytes
Source: eLife journal article supplement (doi:10.7554/elife.96942), 2024-04-23

EP  
42  
WB  
10/6/21

IP →

1. P.M

- control PMA-
- control PMA+
- SHFNL1-YFP-FMNL1/3
- SHFNL1-YFP-FMNL1/3
- FMNL1/3-SIO36A PMA-
- FMNL1/3-SIO36A PMA+
- P.M

2. AIP

- control PMA-
- control PMA+
- FMNL1/3-PMA-
- FMNL1/3-PMA+
- FMNL1/3-SIO36A PMA-
- FMNL1/3-SIO36A PMA+

10 min

α-Phospho-Ser  
PRC substrate  
10/5/21 (6Fe)  
24  
1/1000

250  
150  
100  
75  
50

4

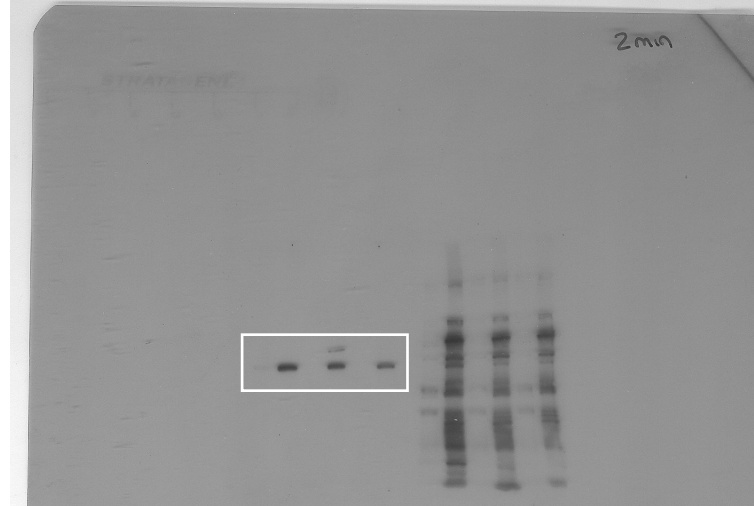

Exp 42

WB INTRATA-ENE

18/06/21

LAIP ↑

2µin

PM.

- control PHA -
- control PHA +
- FMNL1/3 PHA -
- FMNL1/3 PHA +
- FMNL1/3 SIOSEA PHA -
- FMNL1/3 SIOSEA PHA +

P.M.

- control PHA -
- control PHA +
- FMNL1/3 PHA -
- FMNL1/3 PHA +
- FMNL1/3 SIOSEA PHA -
- FMNL1/3 SIOSEA PHA +

250

150

100

2L - FMNL1/3

2020 1/500

18/5/21

LOTE 171

O/N

4C

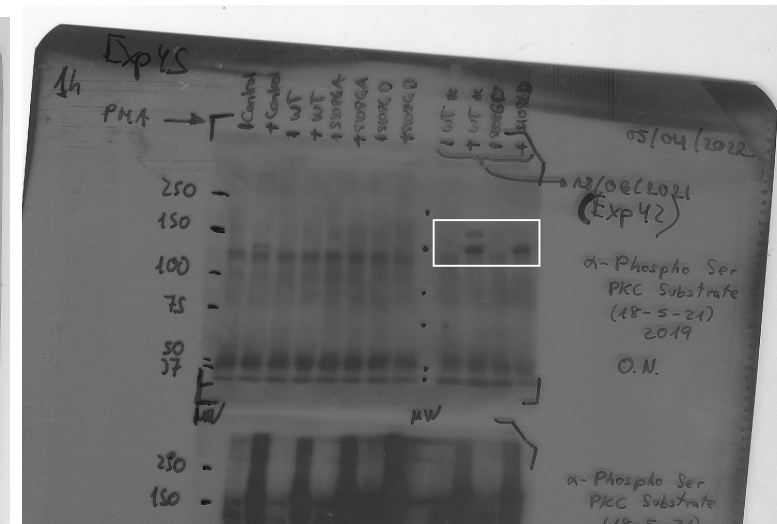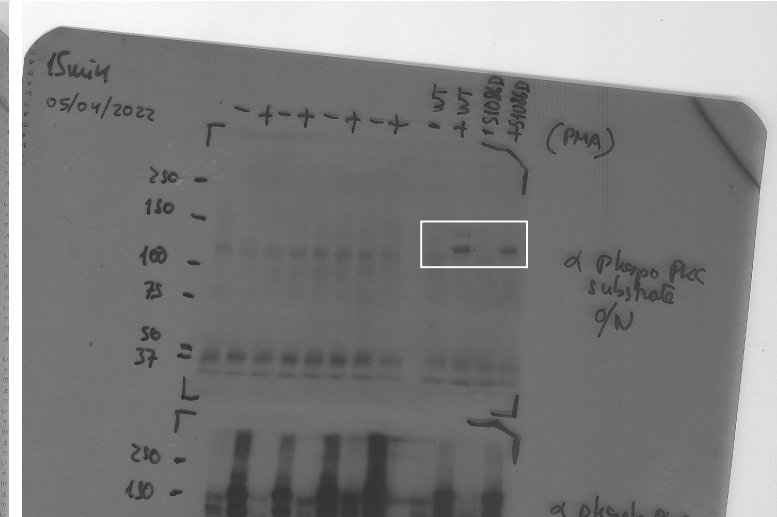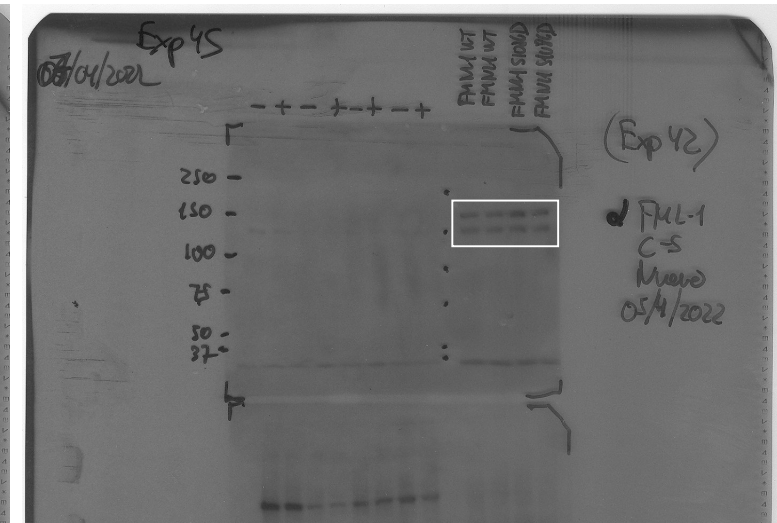

Supplement: fig3-data1 [file elife-96942-fig3-data1-v1.zip]
