# Supplementary figures and images for: Formin-like 1β phosphorylation at S1086 is necessary for secretory polarized traffic of exosomes at the immune synapse in Jurkat T lymphocytes
Source: eLife journal article supplement (doi:10.7554/elife.96942), 2024-04-23

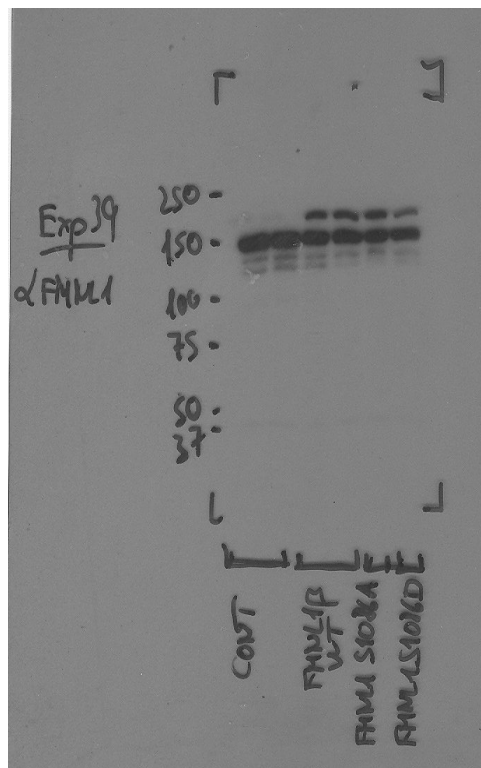

FMNL1 high-actin

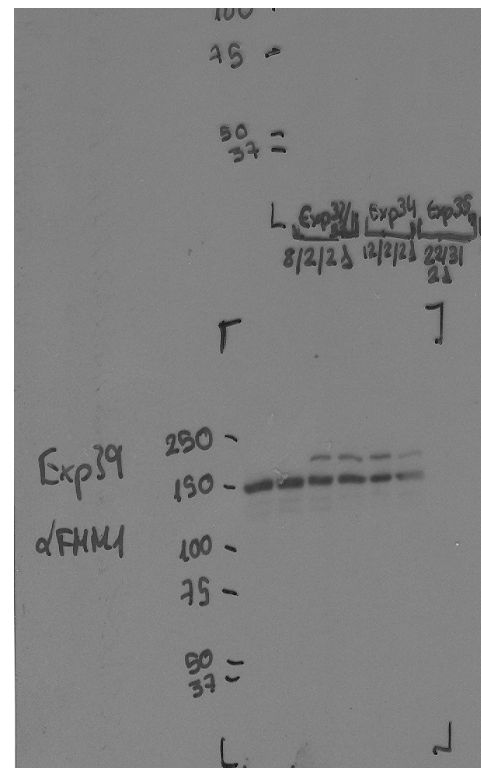

FMNL1 low-actin

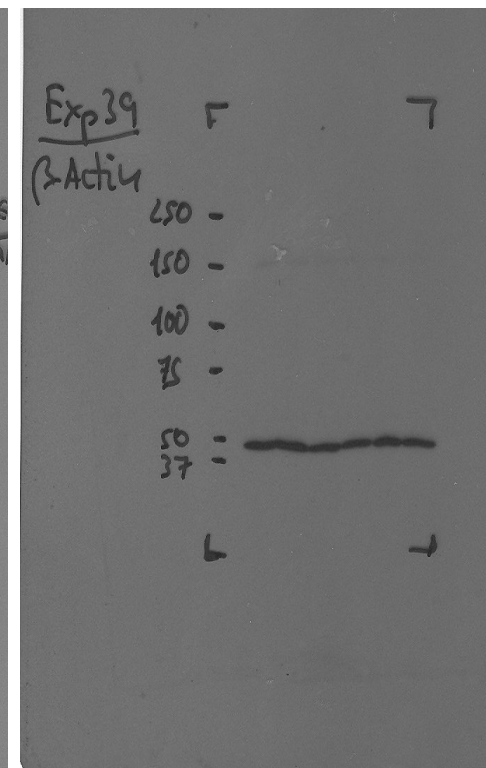

beta-actin

Supplement: fig2-data1 [file elife-96942-fig2-data1-v1.zip]

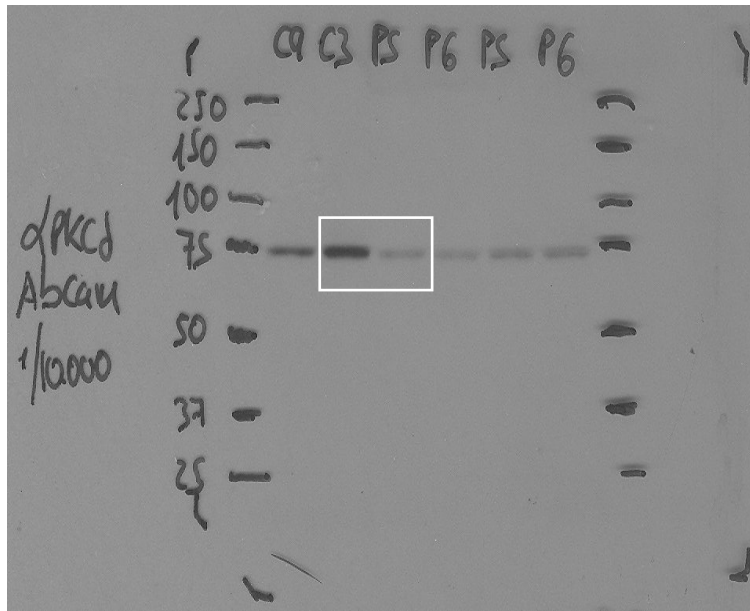

PKCdelta

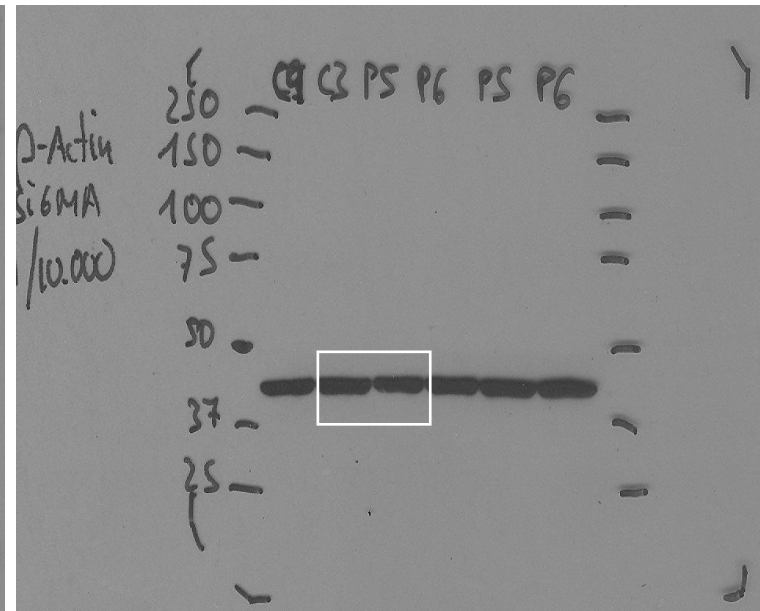

beta-actin

Supplement: fig6-data1 [file elife-96942-fig6-data1-v1.zip]

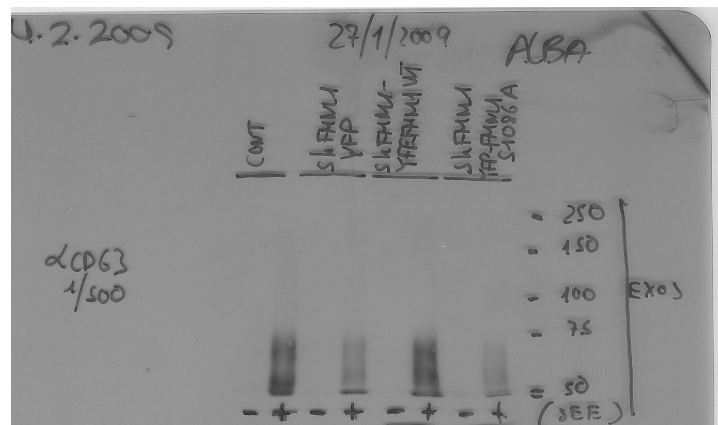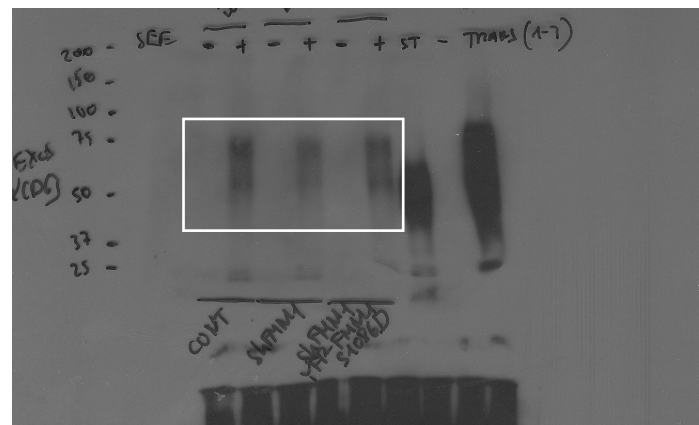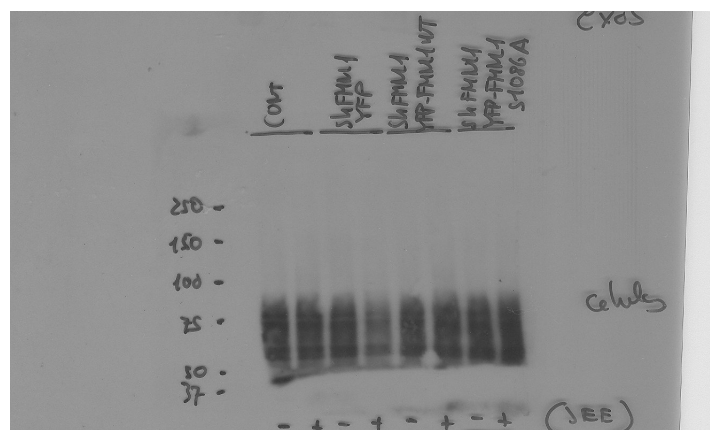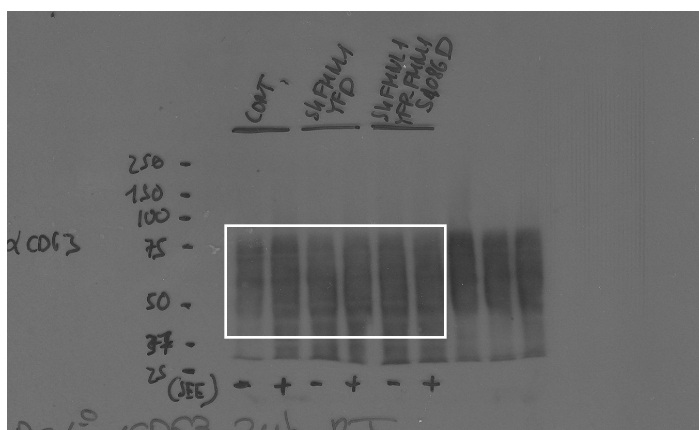

CD63

Supplement: fig9-data1 [file elife-96942-fig9-data1-v1.zip]
